# Supplementary material for: Mechanoluminescent light source for a fluorescent probe molecule
Source: Royal Society of Chemistry journal article supplement (doi:10.1039/c1cc11411e), 2011-01-01
Supplement: c1cc11411e.pdf [file c1cc11411e.pdf]

## Supporting Information (SI)

### Mechanoluminescent light source for a fluorescent probe molecule

Nao Terasaki,<sup>\*a</sup> Hongwu Zhang,<sup>a</sup> Hiroshi Yamada<sup>a</sup> and Chao-Nan Xu<sup>\*a,b</sup>

<sup>a</sup> National Institute of Advanced Industrial Science and Technology (AIST), Measurement Sensing Technology Research Center, 807-1 Shuku-machi, Tosu, Saga 841-0052, Japan. Fax: +81 942 81 3600; Tel: +81 942 8140380; E-mail: nao-terasaki@aist.go.jp

<sup>b</sup> CREST, Japan Science and Technology Corporation (JST), Honcho 4, Kawaguchi, Saitama 32-0012, JAPAN. E-mail: cn-xu@aist.go.jp

#### (SI-1) ML image of ML test pellet composed of CYAE.

As per the method proposed in a previous study, a mechanoluminescent (ML) test pellet composed of  $\text{CaYAl}_3\text{O}_7:\text{Eu}$  (CYAE)<sup>1</sup> was prepared by mixing CYAE powder with an optical epoxy resin and forming a composite disk (diameter: 25 mm; thickness: 15 mm).<sup>2-5</sup> ML images were recorded when a compressive load of up to 1000 N was applied using a universal testing machine (RTC-1310A). CYAE showed blue mechanoluminescence, and the mechanoluminescence intensity distribution have well consistent with the simulated internal stress in the pellet. The ML intensity at the front of the pellet was ca. 10 nW/cm<sup>2</sup>.

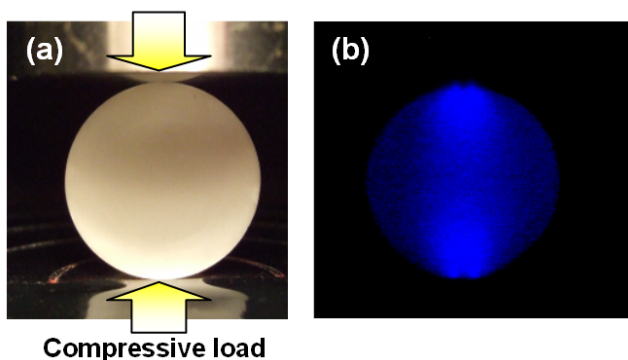

**Fig. S1.** ML images (a) before and (b) during the application of a compressive load of up to 1000 N at a loading speed of 3 mm/min. Sample: ML testing pellet composed of CYAE.

#### REFERENCES

- (1) Zhang, H. W.; Yamada, H.; Terasaki, N.; Xu, C. N. *J. Electrochem. Soc.* **2008**, 155 (5), J128–J131.
- (2) Xu, C. N.; Watanabe, T.; Akiyama, M.; Zheng, X. G. *Appl. Phys. Lett.* **1999**, 74 (17), 2414–2416.
- (3) Xu, C. N.; Zheng, X. G.; Watanabe, T.; Akiyama, M.; Usui, I. *Thin Solid Films* **1999**, 352 (1-2), 273–277.
- (4) Xu, C. N.; Zheng, X. G.; Akiyama, M.; Nonaka, K.; Watanabe, T. *Appl. Phys. Lett.* **2000**, 76 (2), 179-181.
- (5) Xu, C. N. *Encyclopedia of Smart Mterials* **2002**, 4 (1–2), 190–198.
